# Supplementary material for: Quantitative Modeling of Self-Assembly Growth of Luminescent Colloidal CH3NH3PbBr3 Nanocrystals
Source: Atypon-hosted journal article supplement (doi:10.1021/acs.jpcc.9b01339), 2019-04-28
Supplement: jp9b01339_si_001.pdf [file jp9b01339_si_001.pdf]

## Supporting Information

### Quantitative Modeling of Self-Assembly Growth of Luminescent Colloidal $\text{CH}_3\text{NH}_3\text{PbBr}_3$ Nanocrystals

Weizheng Wang,<sup>†</sup> Yumeng Zhang,<sup>†</sup> Wenhui Wu,<sup>†</sup> Xiaoyu Liu,<sup>†</sup> Xuanxuan Ma,<sup>†</sup> Guixiang Qian,<sup>‡</sup> Jiyang Fan<sup>\*,†</sup>

<sup>†</sup>*School of Physics, Southeast University, Nanjing 211189, People's Republic of China*

<sup>‡</sup>*College of Biological and Chemical Engineering, Anhui Polytechnic University, Wuhu 241000, People's Republic of China*

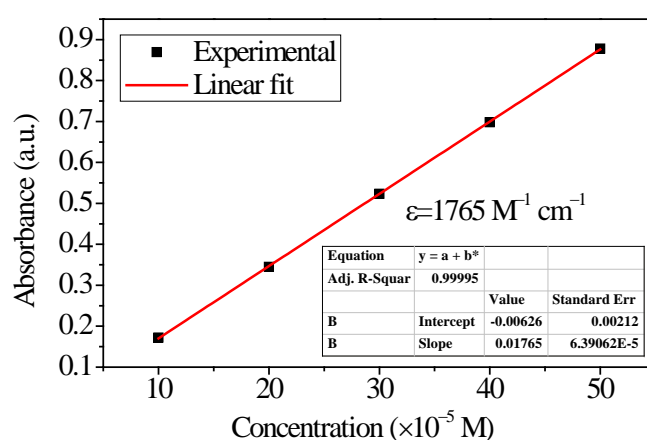

**Figure S1.** Plot of absorbance of different  $\text{MAPbBr}_3$  QD solutions at  $\lambda = 448$  nm as a function of concentration.

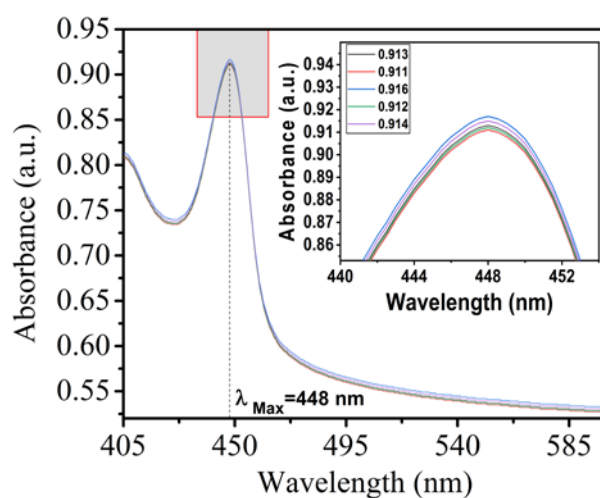

**Figure S2.** UV-vis absorption spectra of five batches of  $\text{MAPbBr}_3$  QD solutions prepared using the same method. Inset shows enlarged region.

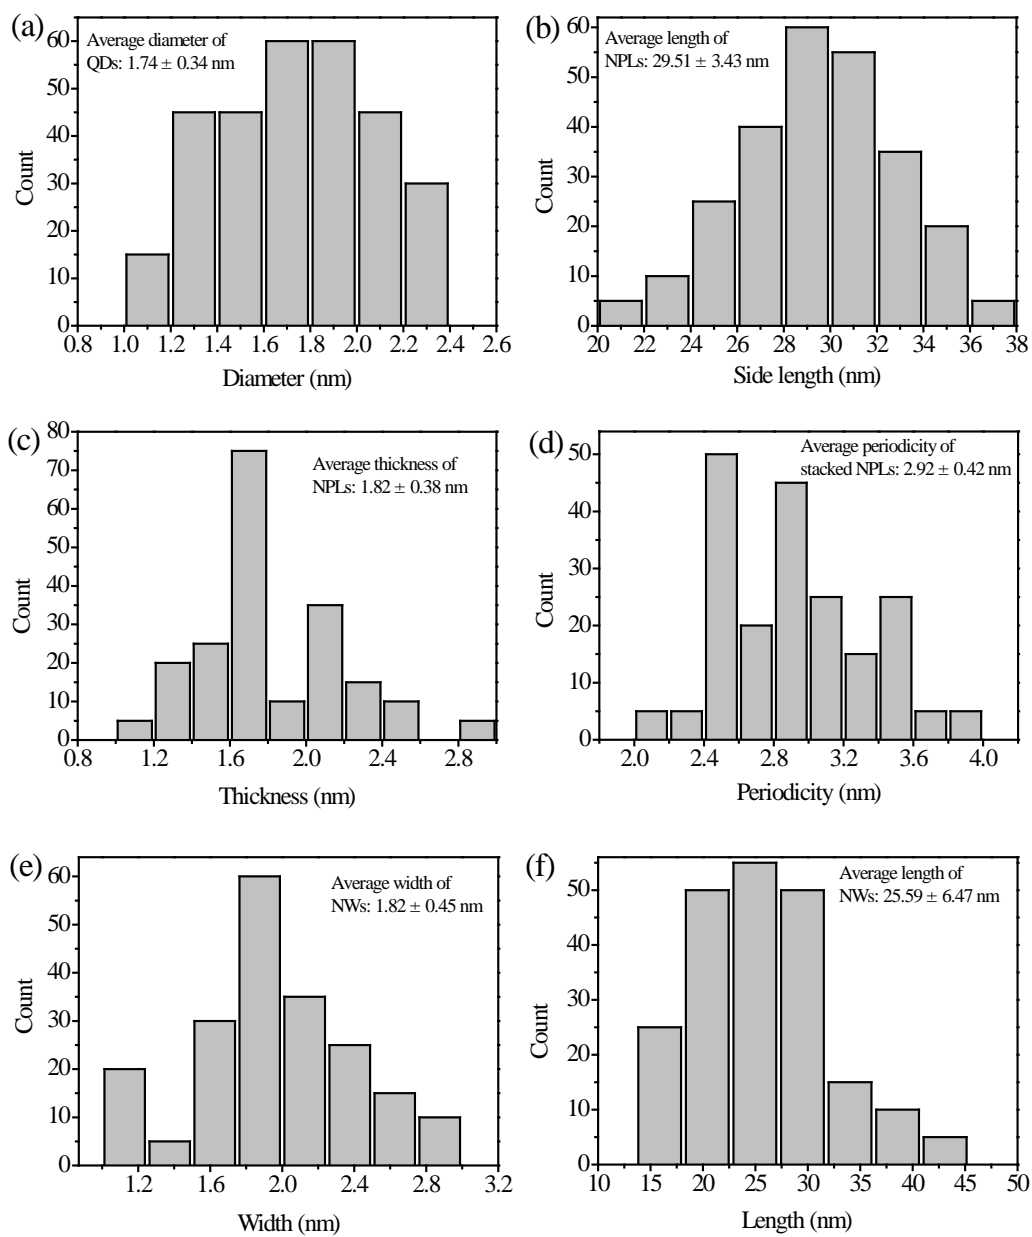

**Figure S3.** Size distribution histograms of MAPbBr<sub>3</sub> QDs, NWs, and NPLs.

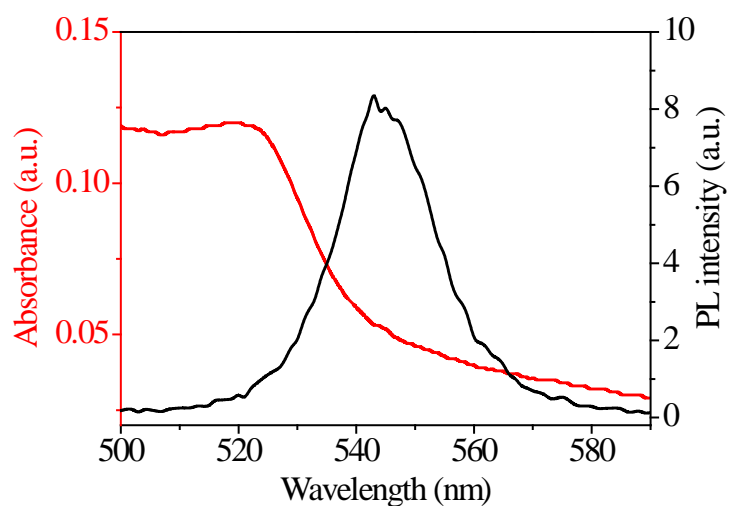

**Figure S4.** UV-vis absorption spectrum and PL spectrum (excitation: 360 nm) of MAPbBr<sub>3</sub> bulk crystal.

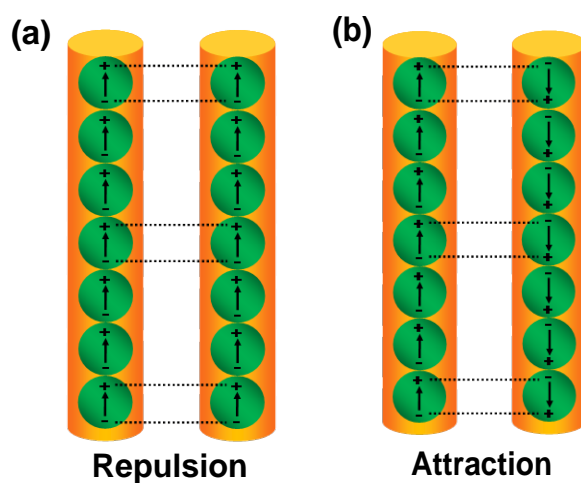

**Figure S5.** Schematic diagram of repulsive/attractive force between NWs in the case of parallel and anti-parallel electric dipoles.

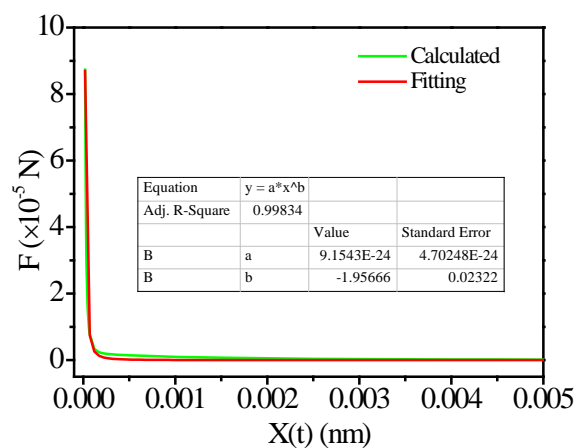

**Figure S6.** Calculated and fitted polarization force as function of separation for two attracting NPLs in liquid medium.

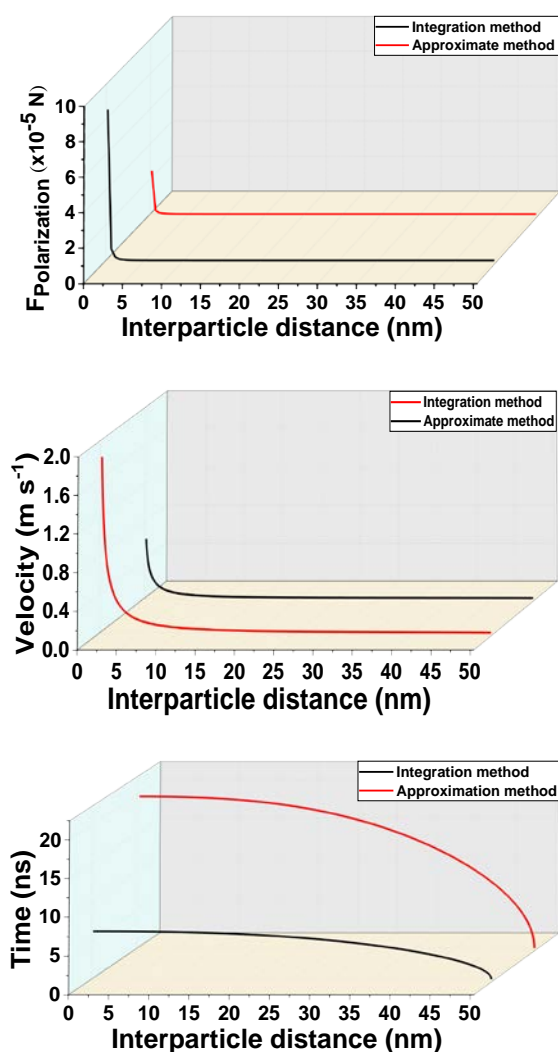

**Figure S7.** Curves of  $F-x$ ,  $v-x$ , and  $t-x$  for two approaching  $\text{MAPbBr}_3$  NPLs obtained by using integration method and approximation method, respectively.

## Details of the calculations

### (1) Calculation of effective permittivity

To calculate the effective permittivity, we should take into account the perovskite core, the organic capping ligands, and the surrounding solvent. According to the previous study,<sup>1,2</sup> the effective permittivity between two interacting particles can be estimated using the following formula:

$$\log \varepsilon_{\text{eff}} = v_1 \log \varepsilon_1 + v_2 \log \varepsilon_2 + v_3 \log \varepsilon_3, \quad (1)$$

where  $\varepsilon_1 = 1000$  is the dielectric constant of  $\text{CH}_3\text{NH}_3\text{PbBr}_3$ ,  $\varepsilon_2$  and  $\varepsilon_3$  represent the dielectric constants of the capping ligands (3.63 for n-octylamine) and the surrounding solvent (2.38 for n-hexane), respectively.  $v_1$ ,  $v_2$ , and  $v_3$  are the corresponding volume fractions:

$$v_1 = \frac{4d^3}{(d+h_0)^2(3Y+2d+4h_0)}, \quad (2)$$

$$v_2 = \frac{4[(d+2h_0)^3-d^3]}{(d+2h_0)^2(3Y+2d+4h_0)}, \quad (3)$$

$$v_3 = \frac{3Y-2d-4h_0}{3Y+2d+4h_0}, \quad (4)$$

where  $d$  is the diameter of the  $\text{CH}_3\text{NH}_3\text{PbBr}_3$  nanoparticle,  $d = 1.74 \pm 0.34$  nm,  $h_0$  is the length of the capping ligand, and  $Y$  is the center-to-center separation of the two interacting nanoparticles.

### (2) Calculation of Debye length

$$\kappa = \left( \frac{4\pi e^2 Z^2 n_i}{\varepsilon_0 \varepsilon_{\text{eff}} k_B T} \right)^{1/2}, \quad (5)$$

where  $e$  is the electron charge,  $Z$  is the valence of the  $\text{MAPbBr}_3$  QD, and  $n_i$  is its equilibrium concentration in the solution.  $\varepsilon_0$  is the permittivity in vacuum,  $\varepsilon_{\text{eff}}$  is the effective permittivity,  $k_B$  is the Boltzmann constant, and the temperature  $T = 300$  K.

### (3) Calculation of effective Hamaker constant

The effective Hamaker constant  $A_{131}$ ,  $A_{232}$ , and  $A_{123}$  can be calculated by using the following formulae:<sup>3</sup>

$$A_{232} = \frac{3k_B T}{4} \left[ \frac{\varepsilon_2 - \varepsilon_3}{\varepsilon_2 + \varepsilon_3} \right]^2 + \frac{3h\nu_e}{16\sqrt{2}} \frac{(n_2^2 - n_3^2)^2}{(n_2^2 + n_3^2)^{3/2}}, \quad (6)$$

$$A_{131} = \frac{3k_B T}{4} \left[ \frac{\varepsilon_1 - \varepsilon_3}{\varepsilon_1 + \varepsilon_3} \right]^2 + \frac{3h\nu_e}{16\sqrt{2}} \frac{(n_1^2 - n_3^2)^2}{(n_1^2 + n_3^2)^{3/2}}, \quad (7)$$

$$A_{123} = \frac{3k_B T}{4} \left[ \frac{\varepsilon_1 - \varepsilon_3}{\varepsilon_1 + \varepsilon_3} \right] \left[ \frac{\varepsilon_2 - \varepsilon_3}{\varepsilon_2 + \varepsilon_3} \right] + \frac{3h\nu_e}{8\sqrt{2}} \frac{(n_1^2 - n_3^2)(n_2^2 - n_3^2)}{\sqrt{(n_1^2 + n_3^2)(n_2^2 + n_3^2)}[\sqrt{n_1^2 + n_3^2} + \sqrt{n_2^2 + n_3^2}]}, \quad (8)$$

where  $\varepsilon_i$  is the static relative permittivity,  $h$  is the Planck's constant,  $\nu_e$  is the main electronic absorption frequency in the UV region.  $n_i$  is the refractive index in the visible region. For the  $\text{MAPbBr}_3$  QDs and NWs,  $\varepsilon_1 = 1000$ ,<sup>4</sup>  $\varepsilon_2 = 3.63$  and  $\varepsilon_3 = \varepsilon_{\text{toluene}} = 2.38$ ,  $\nu_e = 7.09 \times 10^{14}$  Hz,  $n_1 = 2.55$ ,<sup>5</sup>  $n_2 = n_{\text{Octylamine}} = 1.43$

and  $n_3 = n_{\text{toluene}} = 1.50$ . For the MAPbBr<sub>3</sub> NPLs, the main electronic absorption frequency in the UV region  $\nu_e = 6.34 \times 10^{14}$  Hz, as obtained from the UV-vis absorption spectrum.

#### (4) Calculation based on DLVO theory

**For MAPbBr<sub>3</sub> QDs:** The pure stoichiometric MAPbBr<sub>3</sub> QD without surface ligands should have negligible surface charges. However, some study has suggested that the MAPbBr<sub>3</sub> QD might possess a Br<sup>-</sup>-rich surface.<sup>6</sup> The surface charge of such MAPbBr<sub>3</sub> QD with Br<sup>-</sup>-rich surface can be estimated (note that the surface charges will change if there are organic ligands). Hence we estimate the charge of MAPbBr<sub>3</sub> QD by using the method of Ref. 6. The surface charge will be changed when there are enough surface organic ligands.

**For MAPbBr<sub>3</sub> NWs:** The attraction energy between two adjacent MAPbBr<sub>3</sub> NWs is the van der Waals force-related energy:

$$W_A = W_{\text{vdW}} = -\frac{A_{\text{eff}}LR^2}{48\sqrt{2}x(t)^{3/2}}. \quad (9)$$

The repulsion energy consists of the electrostatic interaction energy<sup>7</sup> and the steric energy of surface ligands:<sup>8</sup>

$$W_R = W_E + W_{\text{RS}} = \frac{R}{2} \times Z \times e^{-\kappa x(t)} + \Delta f \cdot S, \quad (10)$$

where  $Z = 64\pi\epsilon_0\epsilon_{\text{eff}}\left(\frac{k_{\text{B}}T}{e}\right)^2 \tanh^2\left(\frac{e\psi_0}{4k_{\text{B}}T}\right)$ ,  $\psi_0 = \frac{\sigma}{\epsilon_0\epsilon_{\text{eff}}\kappa}$ ,  $\sigma$  is the surface charge density of MAPbBr<sub>3</sub>.  $S$  is the shadow area of the nanowire on the screen normal to its velocity.  $\Delta f = 2\left[f\left(\frac{x(t)}{2}\right) - f(h_0)\right]$  ( $0 < x(t) \leq 2h_0$ ) is the steric energy per unit area. And the free energy of the ligand layer per unit area is

$$f(x(t)) = \frac{\pi^2 k_{\text{B}}T\Gamma h_0^2}{6NB^2} \left[ \frac{1}{2} \left(\frac{h_0}{x(t)}\right) + \frac{1}{2} \left(\frac{x(t)}{h_0}\right)^2 - \frac{1}{10} \left(\frac{x(t)}{h_0}\right)^5 \right], \quad (11)$$

where  $\Gamma$  is the grafting density of the organic ligands,  $N$  is the number of the Kuhn monomers, and  $B$  is the characteristic length of the ligand chain.

**For MAPbBr<sub>3</sub> NPLs:** The attractive energy consists of the polarization force-related energy and the van der Waals force-related energy. The polarization force energy can be deduced using the formula of the polarization force between two NPLs, which is obtained by using the integration method. The van der Waals force energy of two attracting NPLs is

$$W_{\text{vdW}} = -\frac{S}{12\pi} \left[ \frac{A_{232}}{x(t)^2} - \frac{2A_{123}}{(x(t)+h_0)^2} + \frac{A_{131}}{(x(t)+2h_0)^2} \right]. \quad (12)$$

The repulsion energy consists of the electrostatic interaction energy and the steric energy of surface ligands. The formula of the electrostatic interaction energy of two adjacent NPLs is  $W_E = (\kappa/2\pi)Ze^{-\kappa x(t)}$ , and the steric energy of the ligands on the NPL surface can be calculated using the same method as that used in the case of the NWs.

**Note:** The movement duration time and velocity of two attracting MAPbBr<sub>3</sub> NCs driven by the polarization force or by the van der Waals force (Figure 5) as well as the

interaction energy between them (Figure 6) are calculated using MATLAB R2015b.

## References

- (1) Sinyagin, A. Y.; Belov, A.; Tang, Z.; Kotov, N. A. Monte Carlo Computer Simulation of Chain Formation from Nanoparticles. *J. Phys. Chem. B* **2006**, *110*, 7500–7507.
- (2) Habeger, C. F.; Condon, C. E.; Khan, S. R.; Adair, J. H. Evaluation of the Calcium Oxalate Monohydrate Hamaker Constant Based on Static Dielectric Constant Determination and Electronic Polarization. *Colloids Surf. B: Biointerface* **1997**, *10*, 13–21.
- (3) Kontogeorgis, G. M.; Kiil, S. Introduction to Applied Colloid and Surface Chemistry. New York: John Wiley & Sons, 2016.
- (4) Liu, L.; Huang, S.; Pan, L.; Shi, L. J.; Zou, B.; Deng, L.; Zhong, H. Colloidal Synthesis of  $\text{CH}_3\text{NH}_3\text{PbBr}_3$  Nanoplatelets with Polarized Emission through Self-Organization. *Angew. Chem. Int. Ed.* **2017**, *56*, 1780–1783.
- (5) Wang, K.; Gu, Z.; Liu, S.; Li, J.; Xiao, S.; Song, Q. Formation of Single-Mode Laser in Transverse Plane of Perovskite Microwire via Micromanipulation. *Opt. Lett.* **2016**, *41*, 555–558.
- (6) Zhang, F.; Zhong, H.; Chen, C.; Wu, X.-G.; Hu, X.; Huang, H.; Han, J.; Zou, B.; Dong, Y. Brightly Luminescent and Color-Tunable Colloidal  $\text{CH}_3\text{NH}_3\text{PbX}_3$  (X = Br, I, Cl) Quantum Dots: Potential Alternatives for Display Technology, *ACS Nano* **2015**, *9*, 4533–4542.
- (7) Israelachvili, J. N. Electrostatic Forces between Surfaces in Liquids. In *Intermolecular and Surface Forces*, 2011; pp 291–340.
- (8) Bishop, K. J.; Wilmer, C. E.; Soh, S.; Grzybowski, B. A. Nanoscale Forces and their Uses in Self-Assembly. *Small* **2009**, *5*, 1600–1630.
